# Supplementary material
Source: bioRxiv or medRxiv preprint supplement (https://www.biorxiv.org/highwire/filestream/86328/field_highwire_adjunct_files/0/082651-1.pdf)
Supplement: Supplementary file [file 082651-1.pdf]

Supplementary Figure 1: Increasing amount of genomic DNA from cell lines used as positive or negative controls for HPV16 (A, B) and HPV18 (C, D) PCR.

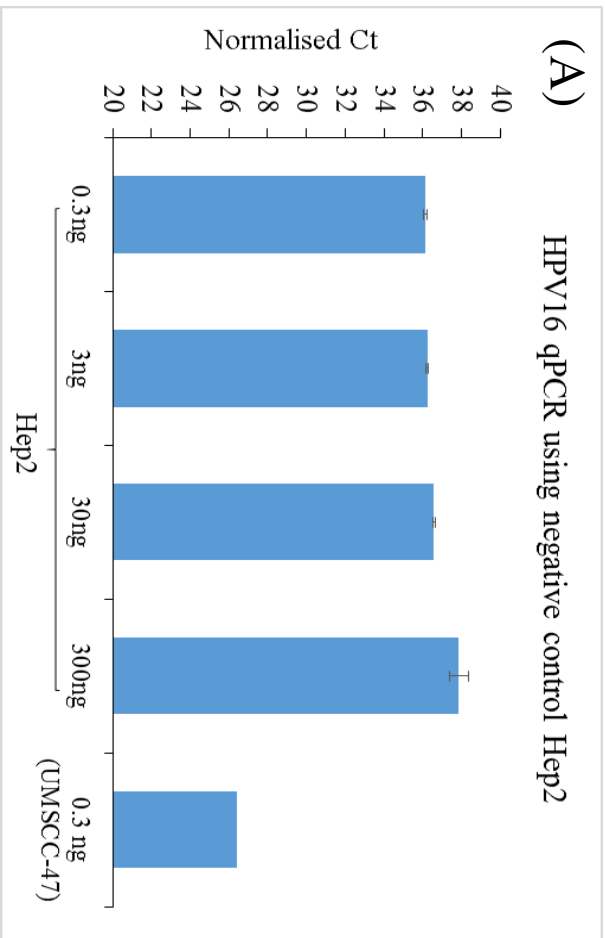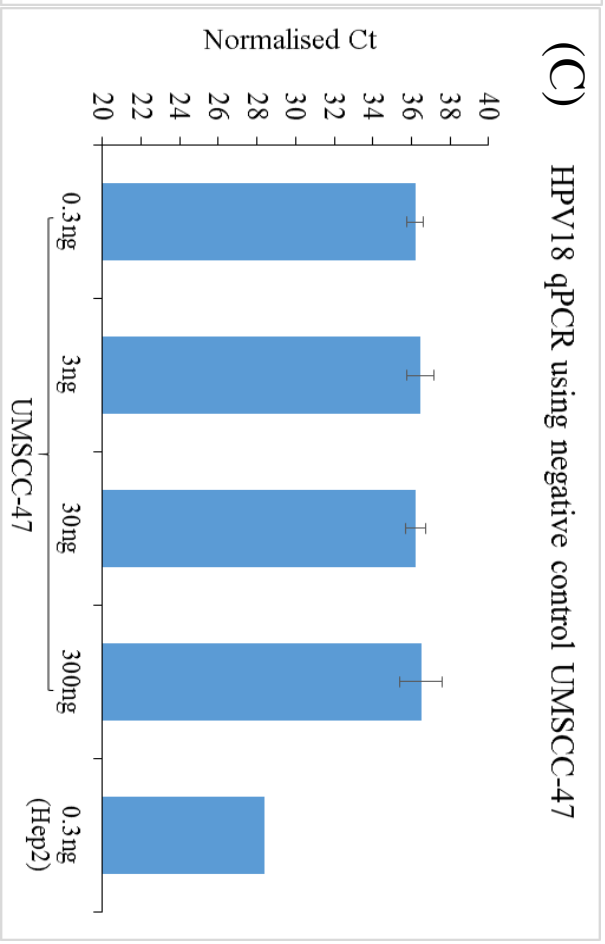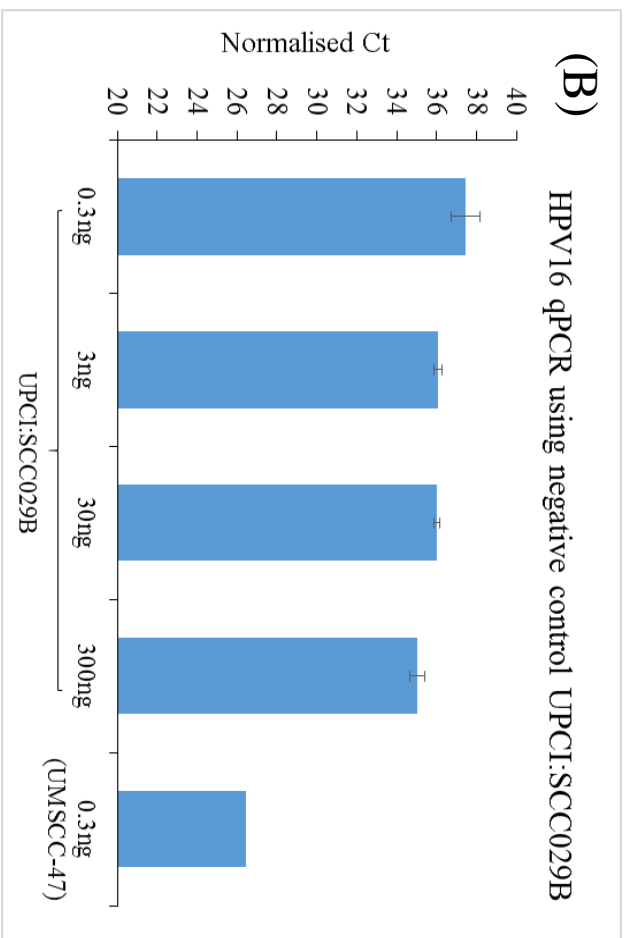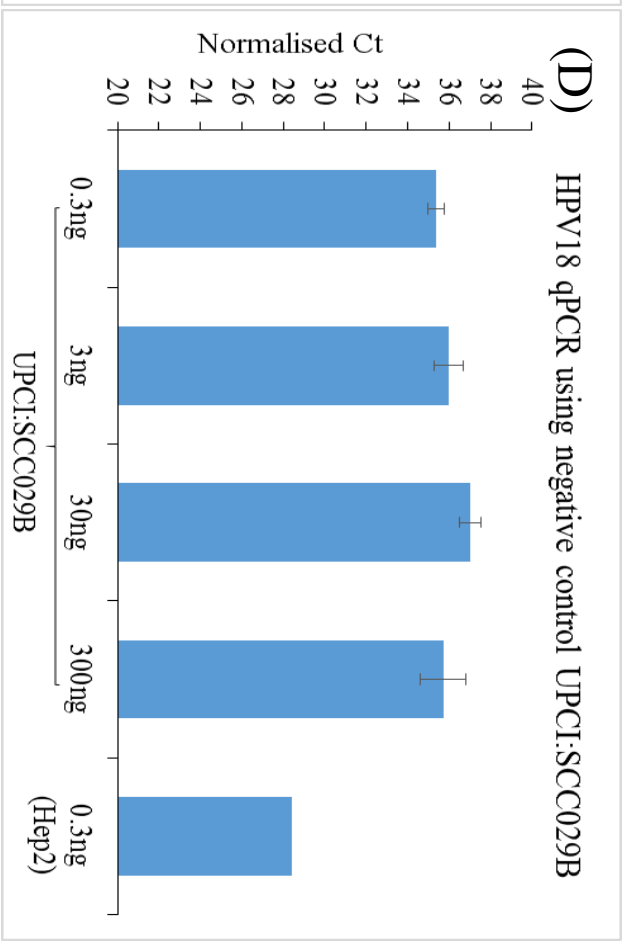

Supplementary Figure 2: Amplification efficiency of HPV16E6 and HPV18L1 primers measured by PCR amplification of serially diluted HPV16/18 cloned plasmid copies.

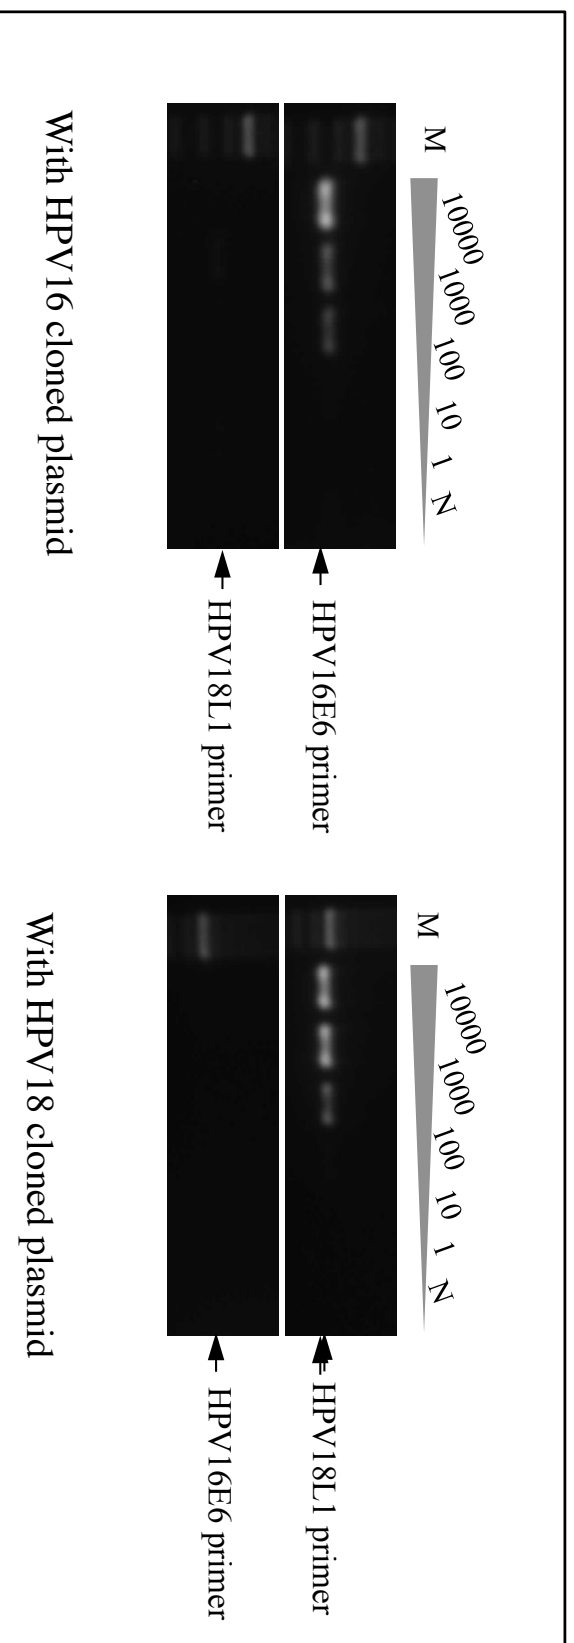

Supplementary Figure 3: HPV PCR performed using different sets of consensus/type specific primers with OSCC tumor DNA. OT: oral tongue, BM: buccal mucosa.

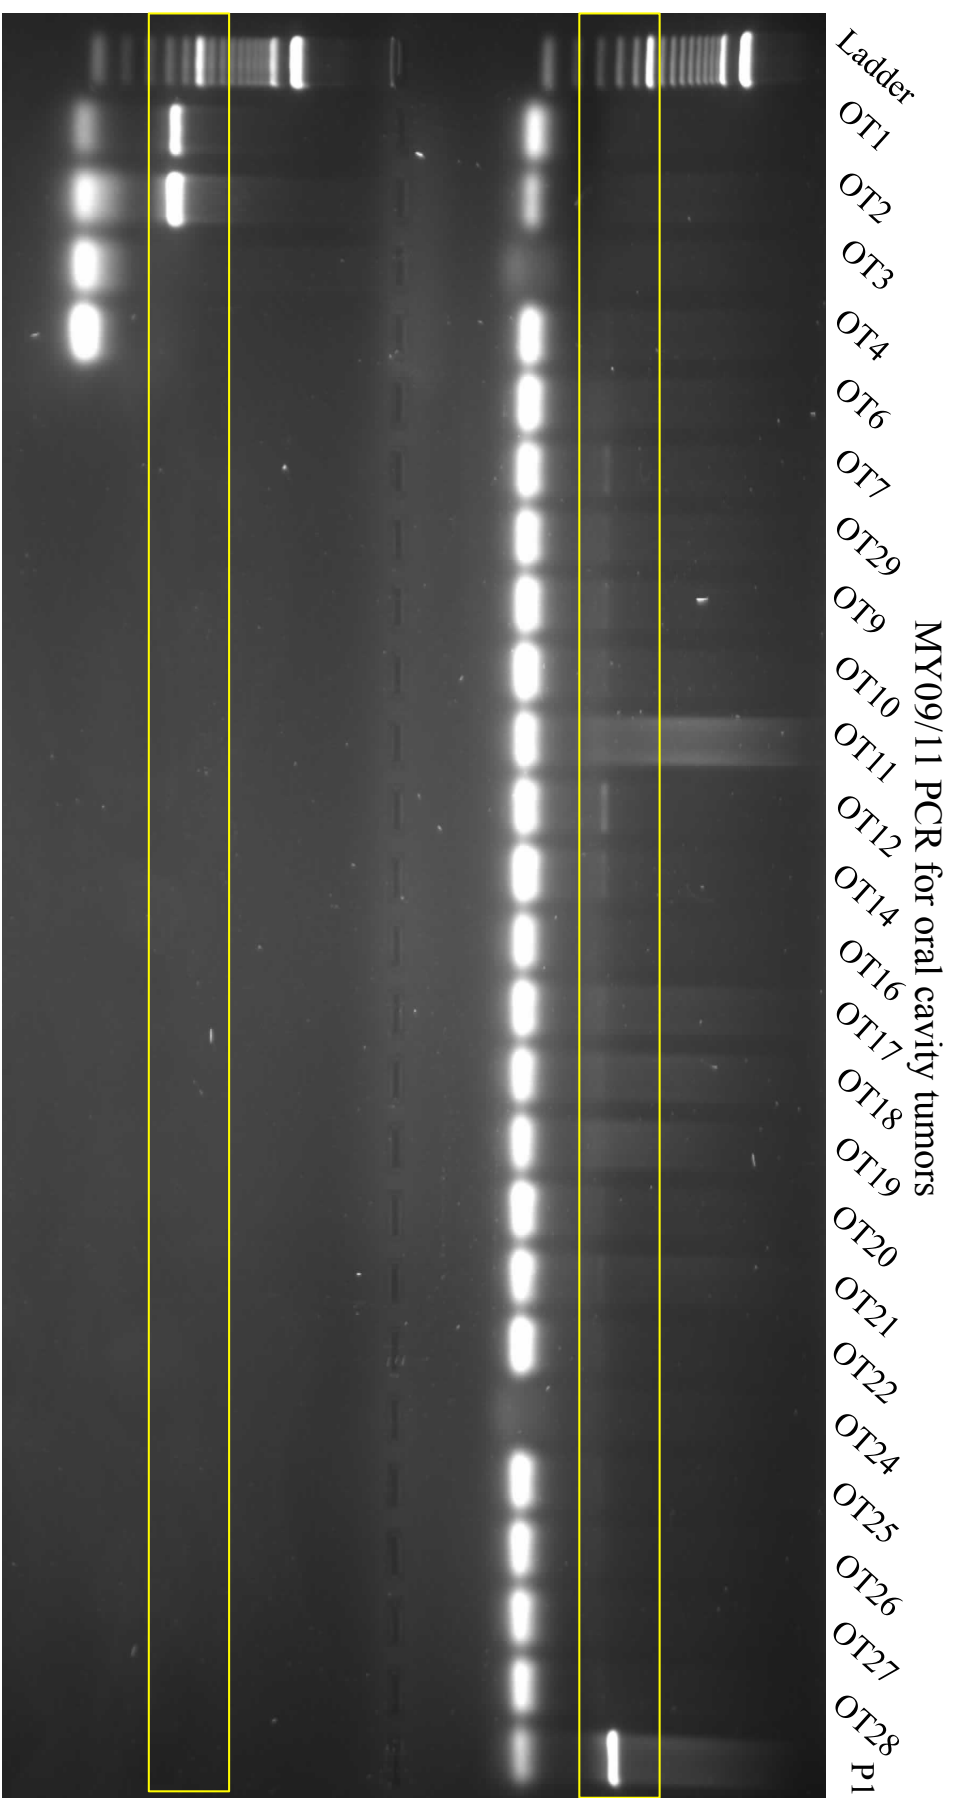

P2 P3 N1 N2

- P1-positive control cervical DNA sample1
- P2-positive control cervical DNA sample2
- P3-UMSCC47 DNA (HPV16 positive cell line)
- N1-UPCI:SCC029B DNA (300ng)
- N2/NTC-No Template Control

### HPV16\_E6 PCR for oral cavity tumors

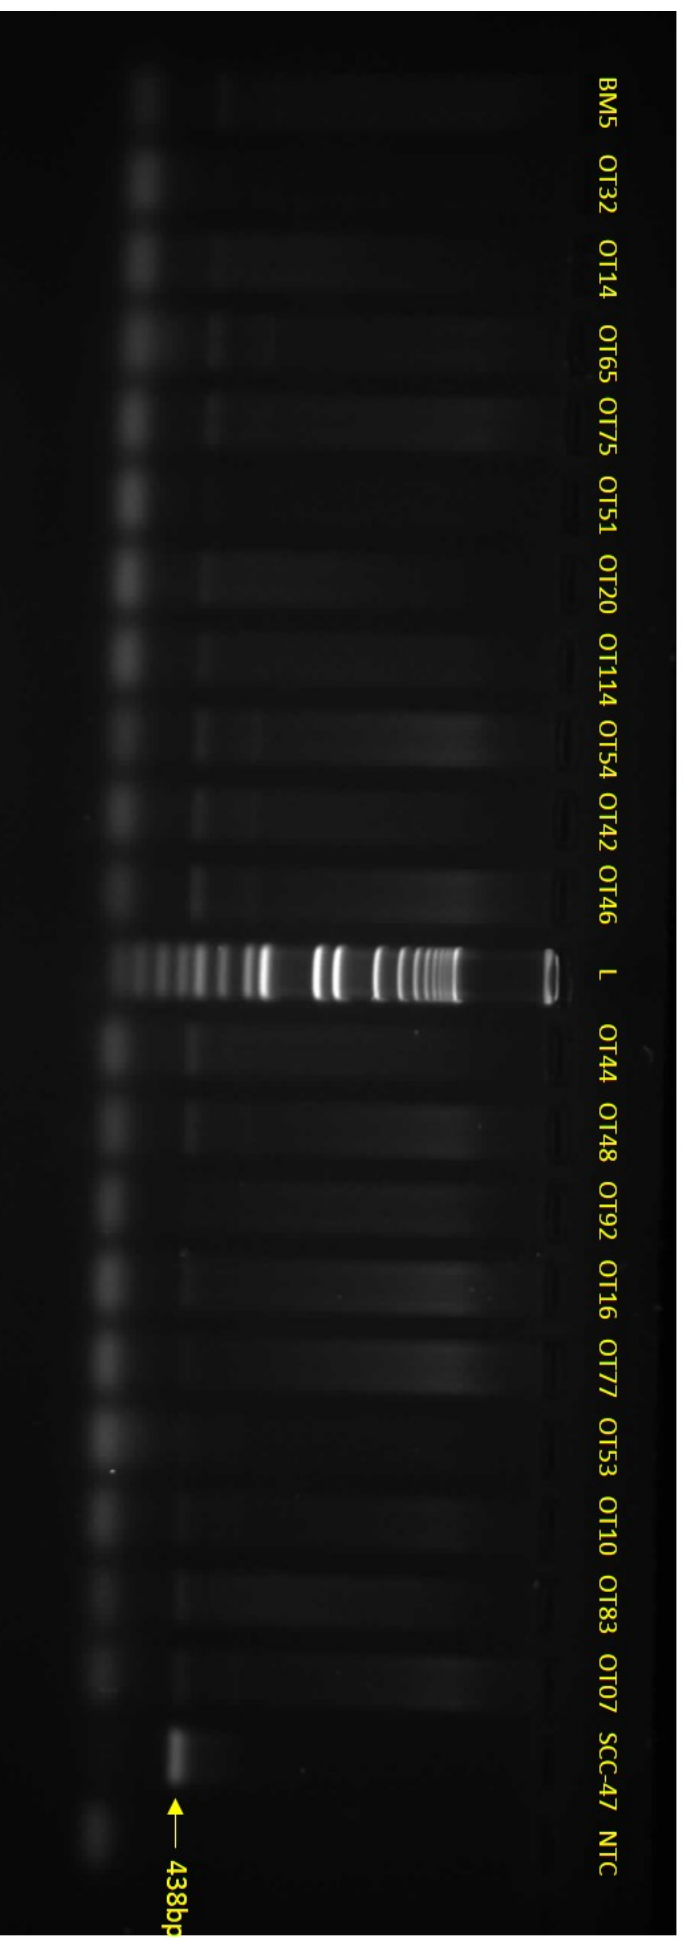

### HPV18L1 PCR for oral tumors (using cell lines as -ve & +ve controls)

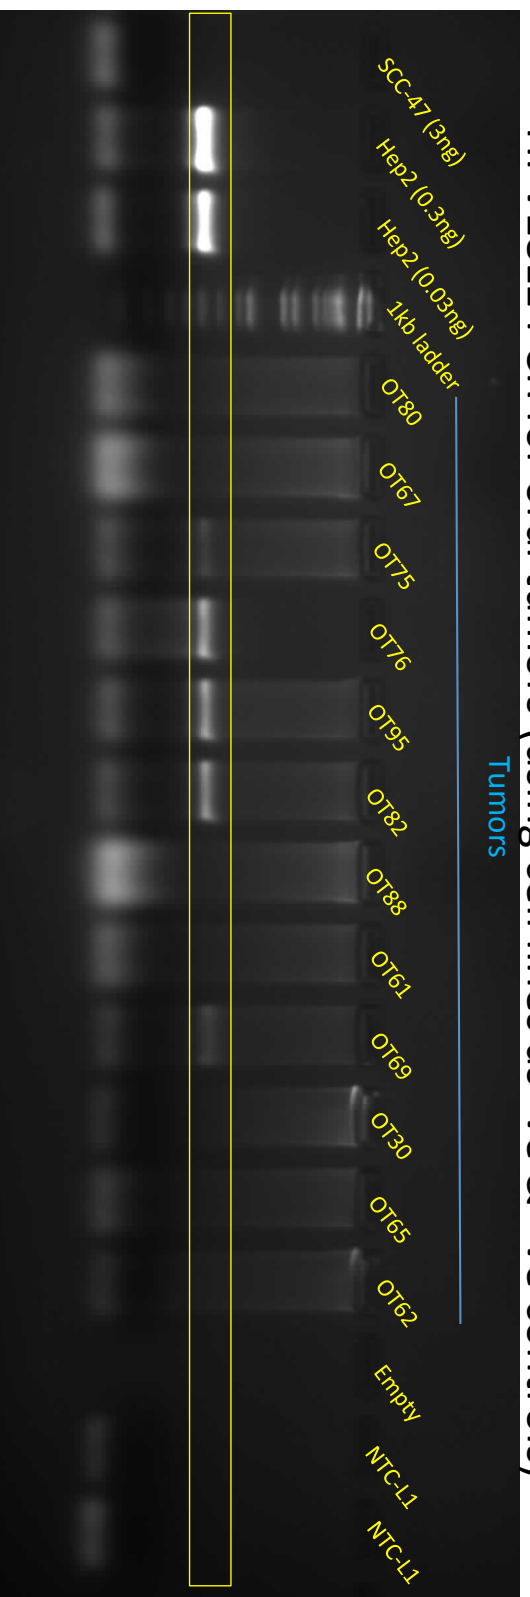

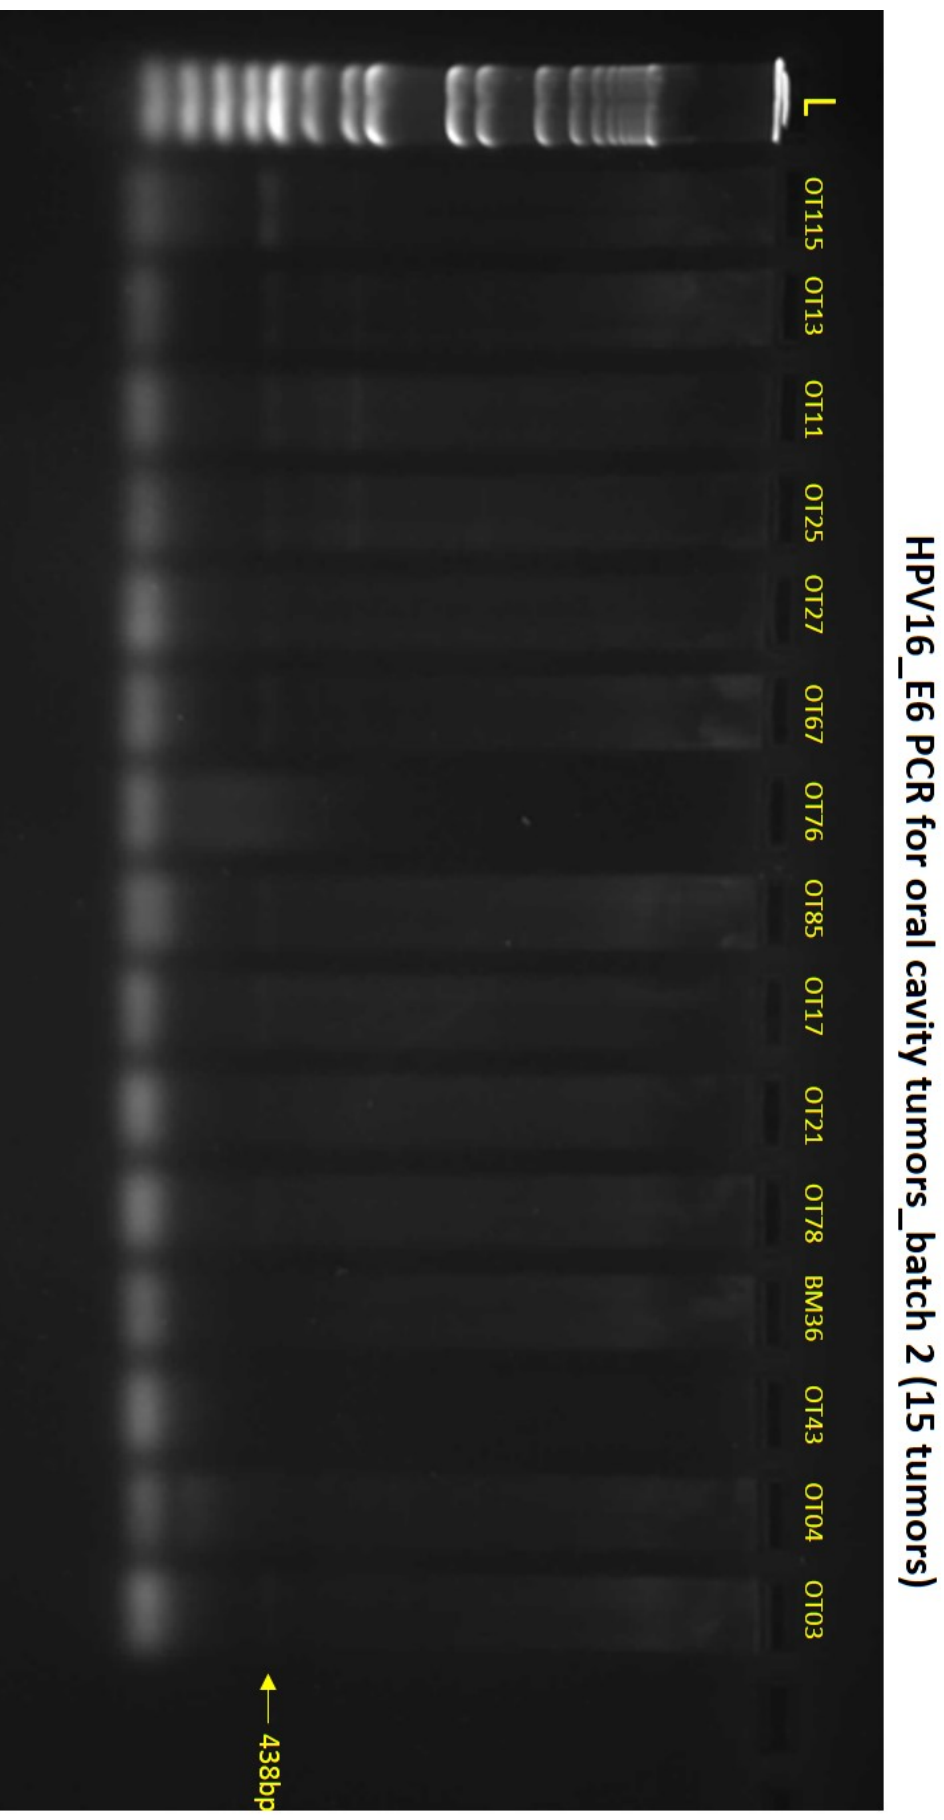

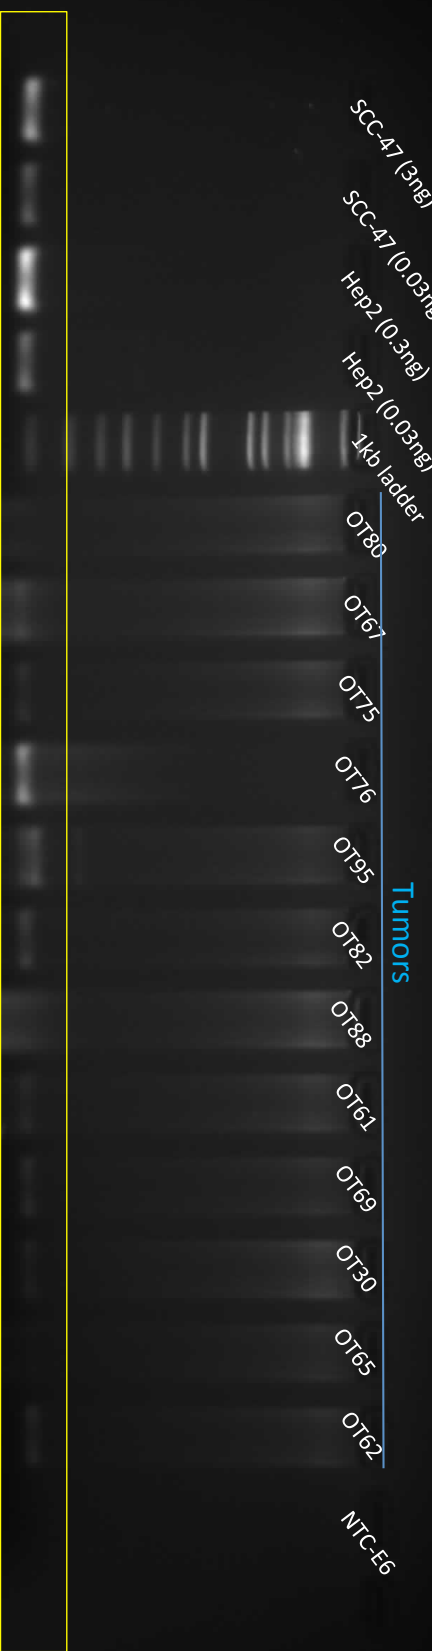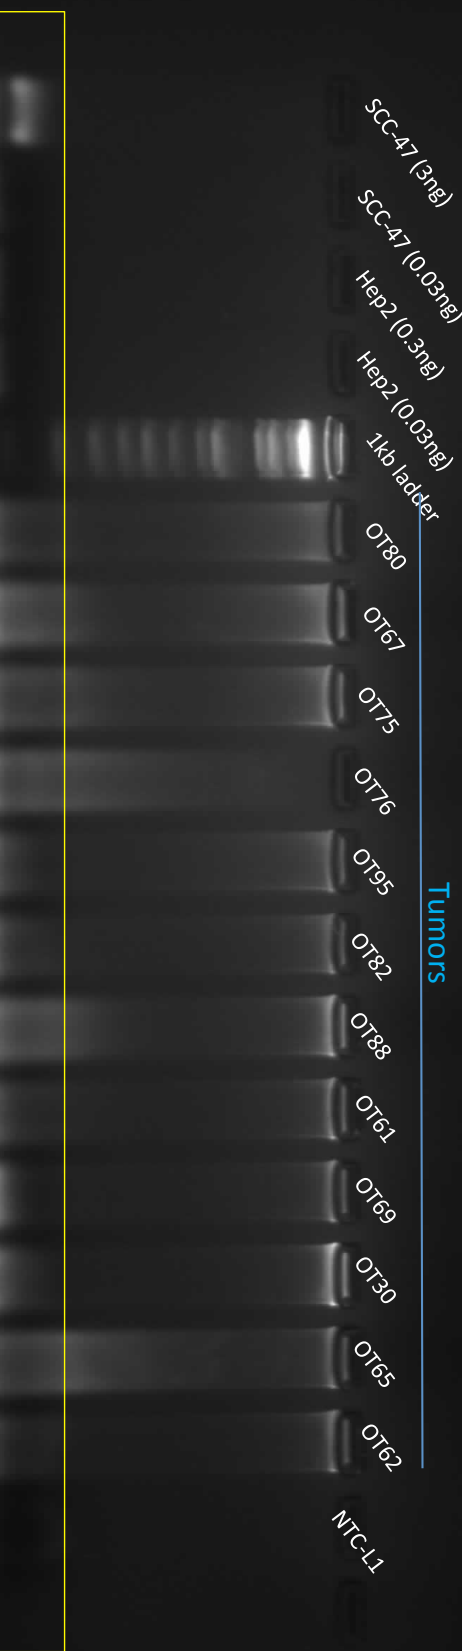

Supplementary Figure 4: Inhibition of amplification reactions in HPV detection in PCR at high concentration of tumor genomic DNA with spike-in experiment using UM-SCC47 cell line.

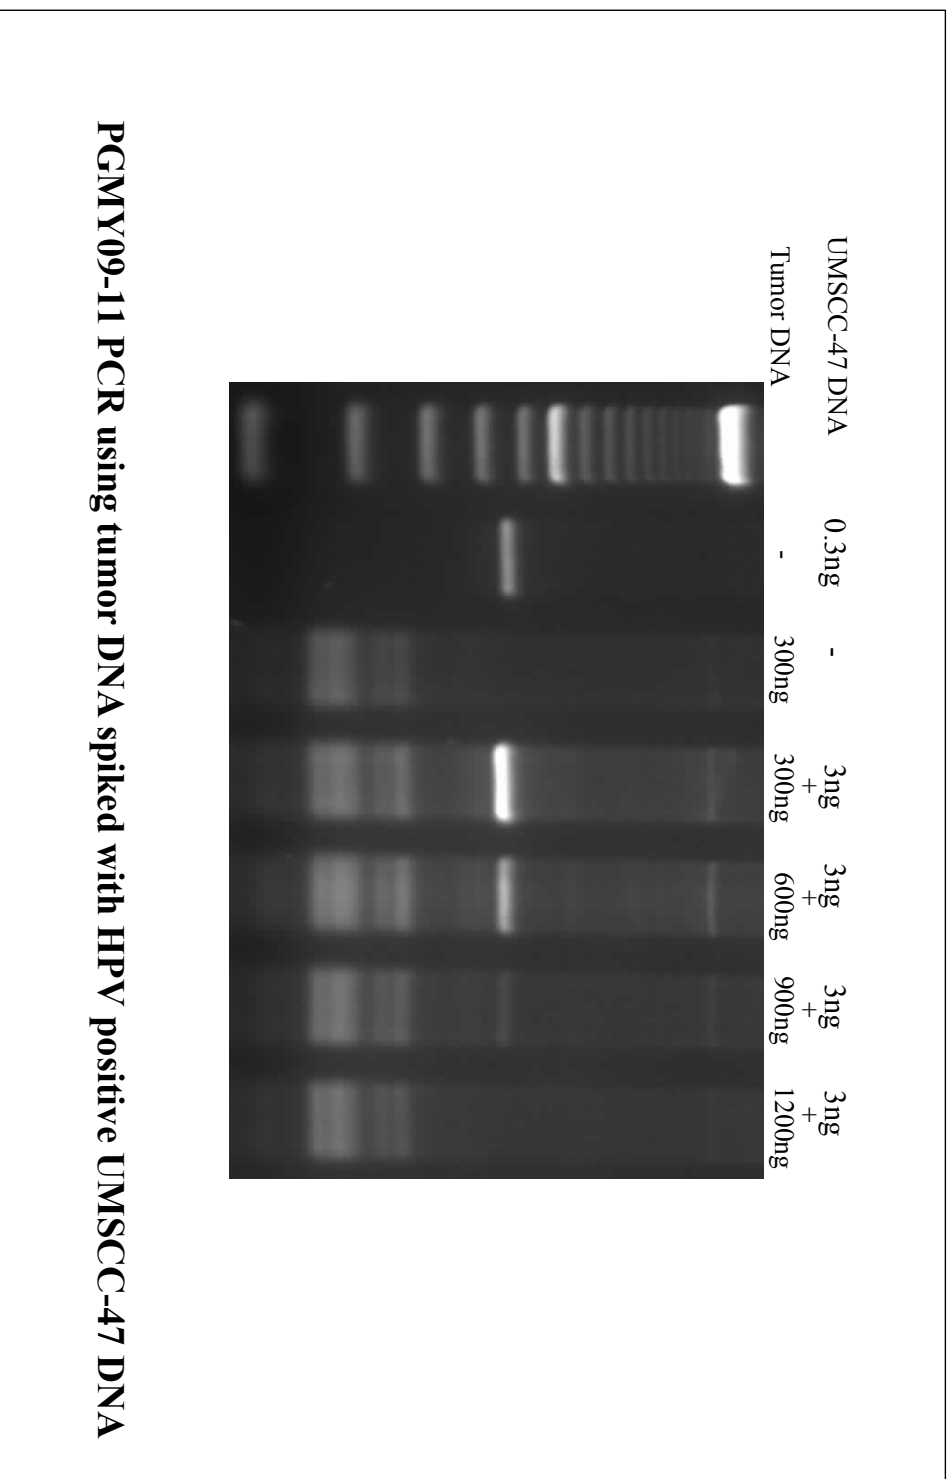

Supplementary Figure 5: The effect of amplification cycle on PCR. The genomic DNA used for positive control (UM-SCC-47) and negative control cell lines were 6, 3.0ng and 300ng respectively.

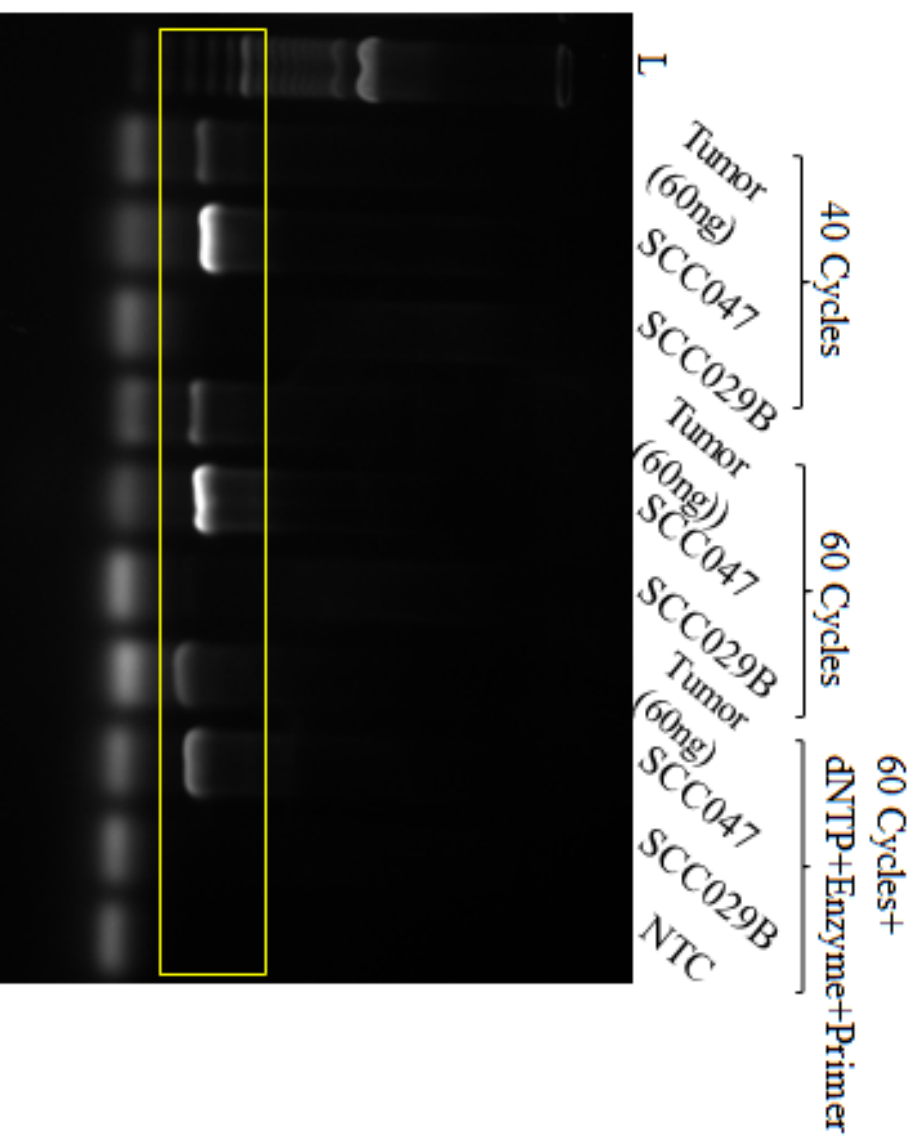



Supplementary Figure 6: Positive and negative cell line DNA used for threshold in ddPCR experiment.

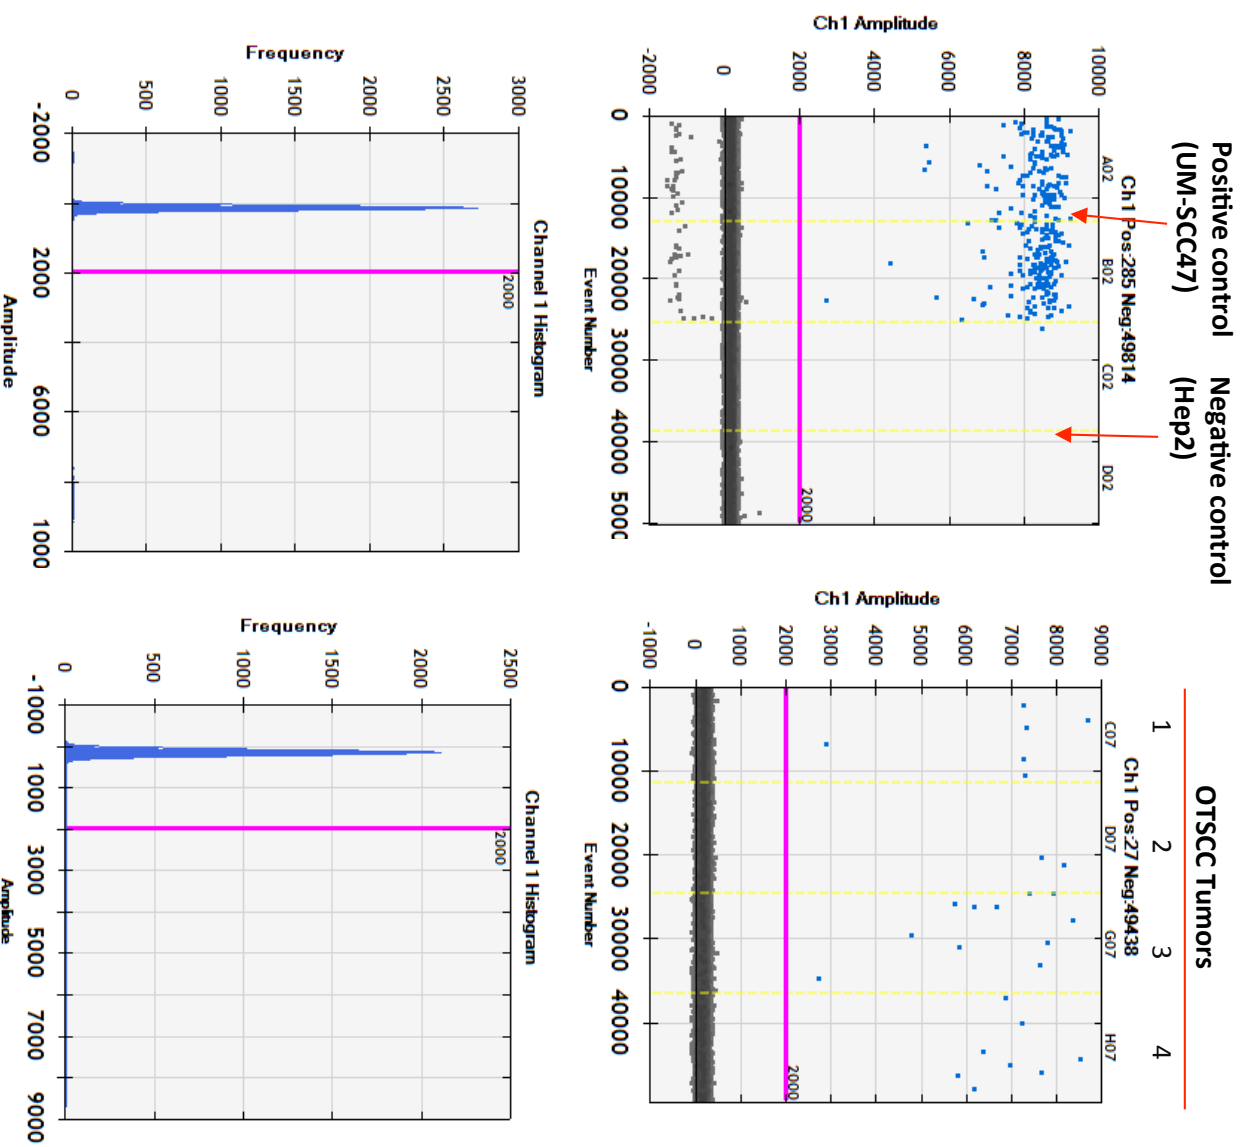

Supplementary Figure 7: KM survival analysis with tumor with habits (A-D), age (E), and nodal status (F).

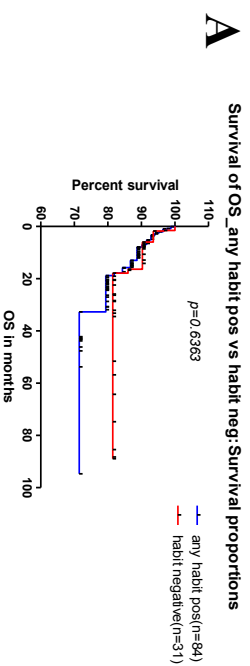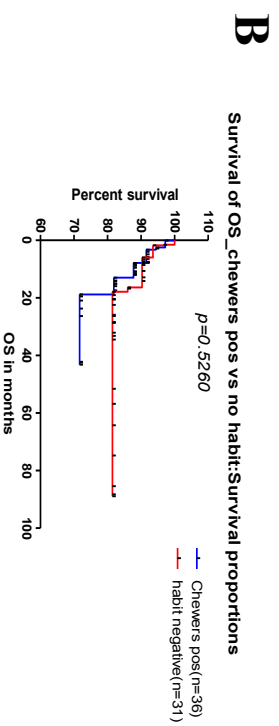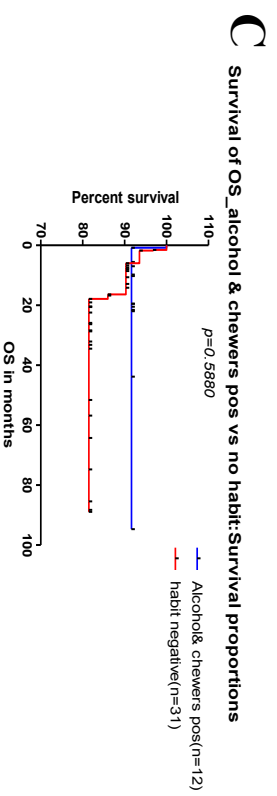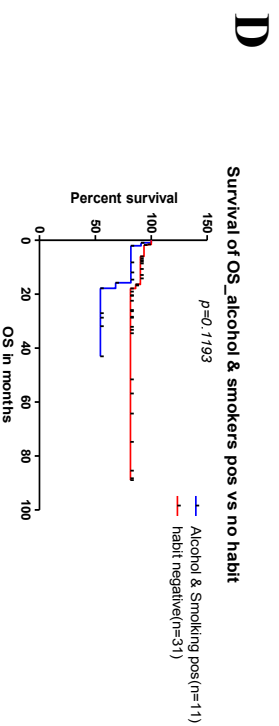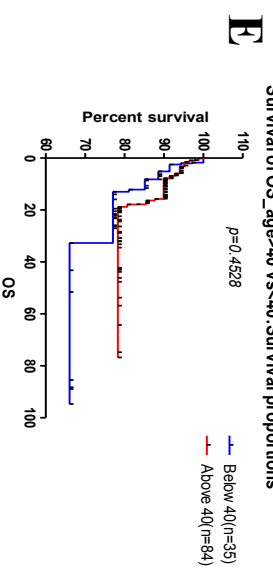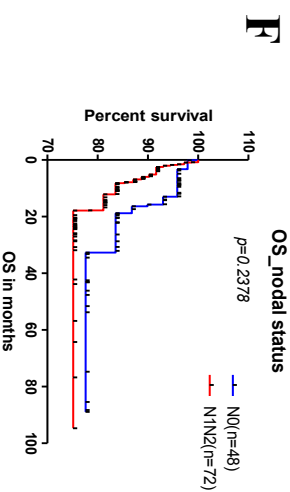

Supplementary Figure 8: KM survival analysis with HPV DNA (A-H), and RNA (I,J).

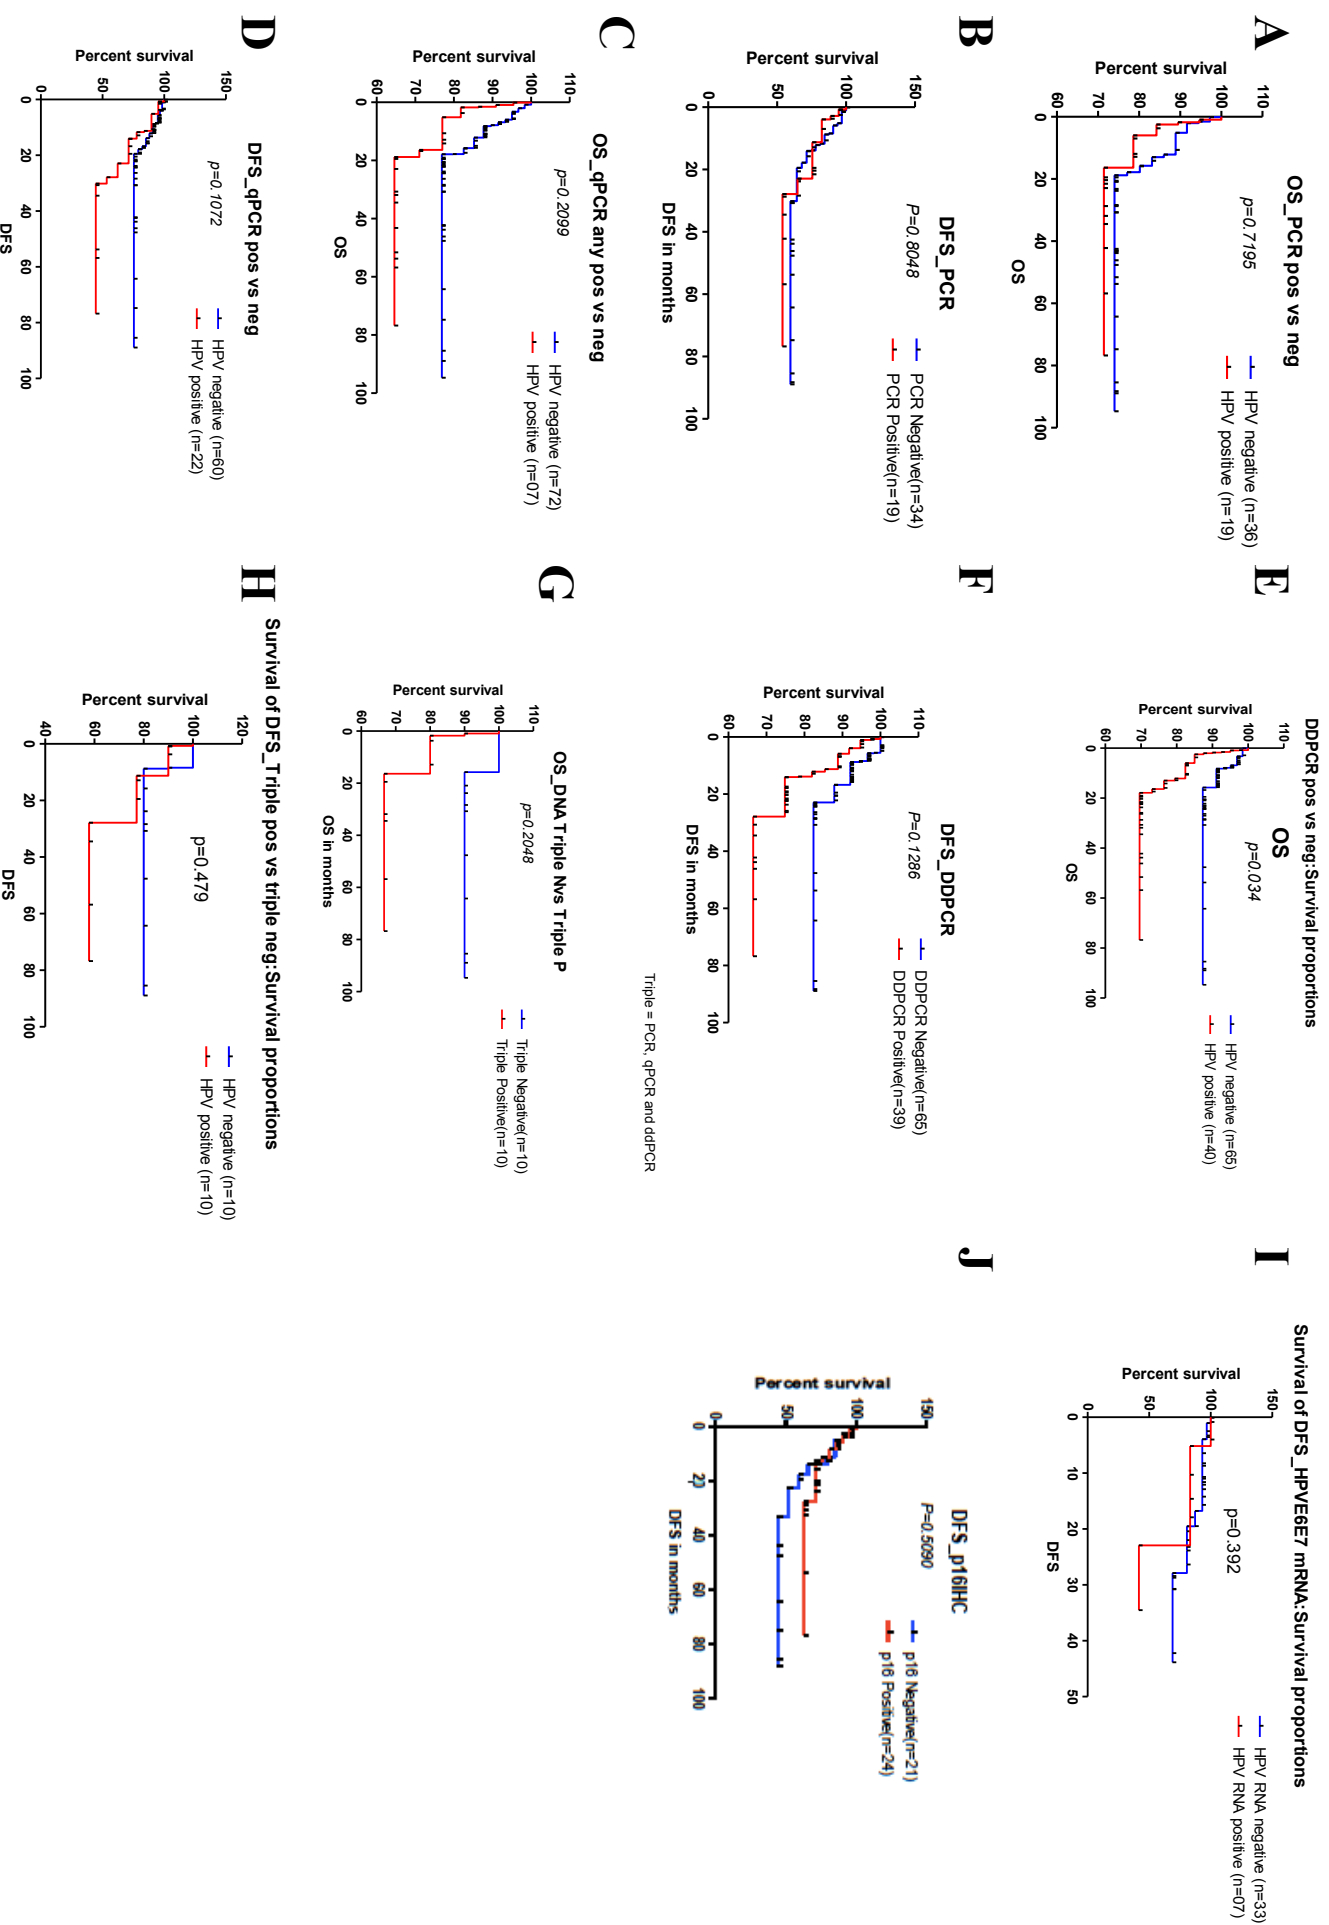

Supplementary Figure 9: KM survival analysis with tumors with high copy DNA and/or HPV RNA (A, B) and HPV -ve tumors with mutations in significant genes (C, D)..

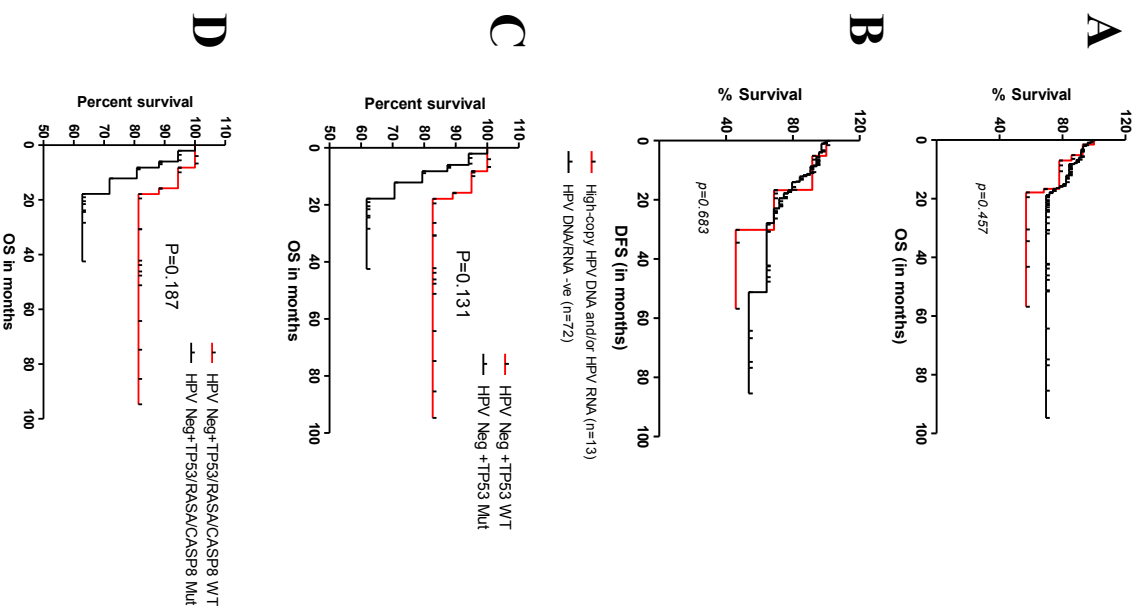

Supplementary Figure 10: Mutational frequency in tumors with mutations in three commonly mutated genes.

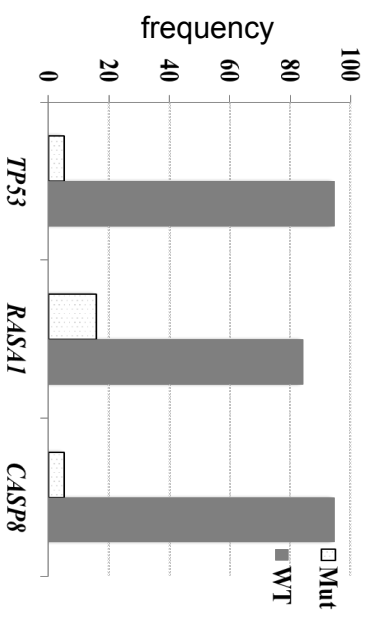



|                     |                                                                        |    |             |     |                                                                 |                             |
|---------------------|------------------------------------------------------------------------|----|-------------|-----|-----------------------------------------------------------------|-----------------------------|
| CP I/II             |                                                                        | E1 | 1777 - 1942 | 188 | 94°C : 5 min<br>94°C : 60 sec                                   |                             |
|                     | 5' TTA TCW TAT GCC CAY TGT ACC AT 3'                                   |    |             |     | 61.7°C : 60 sec                                                 |                             |
|                     | 3' ATG TTA ATW SAG CCW CCA AAA TT 5'                                   |    |             |     | 72°C : 30 sec                                                   |                             |
|                     |                                                                        |    |             |     | 40 cycles                                                       |                             |
|                     |                                                                        |    |             |     | 72°C : 7 min & 4°C hold                                         |                             |
| PGMY09/11           | Pool of 11 F & 9 R primers form Gravitt et al., J Clin Microbiol, 2000 | L1 | 6602 - 7034 | 450 | 94°C : 5 min<br>94°C : 60 sec                                   |                             |
|                     |                                                                        |    |             |     | 57.8 °C : 60 sec                                                |                             |
|                     |                                                                        |    |             |     | 72°C : 60 sec                                                   |                             |
|                     |                                                                        |    |             |     | 40 cycles                                                       |                             |
|                     |                                                                        |    |             |     | 72°C : 7 min & 4°C hold                                         |                             |
| HPV 16E6 PCR primer |                                                                        | E6 | 119-556     |     | 94°C : 3 min<br>94°C : 30 sec<br>53°C : 30 sec<br>72°C : 30 sec | Newly designed used for PCR |
|                     | 5' CAG GAG CGA CCC AGA AAG TT 3'                                       |    |             | 438 | 53°C : 30 sec                                                   |                             |
|                     | 3 CAG CTG GGT TTC TCT ACG TGT 5'                                       |    |             |     | 72°C : 30 sec                                                   |                             |
|                     |                                                                        |    |             |     | 40 cycles                                                       |                             |
|                     |                                                                        |    |             |     | 72°C : 2 min & 4°C hold                                         |                             |
| HPV 18L1 PCR primer |                                                                        | L1 | 6141-6676   | 536 | 94°C : 3 min<br>94°C : 40 sec<br>55°C : 40 sec<br>72°C : 30 sec |                             |
|                     | 5' TCG CGT CCT TTA TCA CAG GGC GA 3'                                   |    |             |     | 94°C : 40 sec                                                   |                             |
|                     | 3' TGC CCA GGT ACA GGA GAC TGT G 5'                                    |    |             |     | 55°C : 40 sec                                                   |                             |
|                     |                                                                        |    |             |     | 72°C : 30 sec                                                   |                             |
|                     |                                                                        |    |             |     | 40 cycles                                                       |                             |
|                     |                                                                        |    |             |     | 72°C : 2 min & 4°C hold                                         |                             |

| <b>qPCR</b>                   |                                         |                                      |                                     |             |                                            |                                                   |               |                                            |                                                   |
|-------------------------------|-----------------------------------------|--------------------------------------|-------------------------------------|-------------|--------------------------------------------|---------------------------------------------------|---------------|--------------------------------------------|---------------------------------------------------|
| <b>HPV16E6 cloning primer</b> | 5' CAG GAG CGA CCC AGA AAG TT 3'        | E6                                   | 119 - 556                           | 438         | as described above                         | Used for cloning HPV16E6 region in PUC19 plasmid. |               |                                            |                                                   |
|                               |                                         | 3 CAG CTG GGT TTC TCT ACG TGT 5'     |                                     |             |                                            |                                                   |               |                                            |                                                   |
|                               |                                         |                                      |                                     |             |                                            |                                                   |               |                                            |                                                   |
|                               | <b>HPV16E6 qPCR</b>                     | 5' GCA CAG AGC TGC AAA CAA CT 3'     | E6                                  | 150 - 256   |                                            |                                                   | 107           | 95°C : 3 min                               |                                                   |
|                               |                                         | 3' GCA TAA ATC CCG AAA AGC AA 5'     |                                     |             |                                            |                                                   |               | 95°C : 30 sec                              |                                                   |
|                               |                                         | probe-ATTAGAATGTGTACTTGAAGCA-FAM-BHQ |                                     |             |                                            |                                                   |               |                                            | 55°C : 30 sec                                     |
|                               |                                         |                                      |                                     |             |                                            |                                                   |               |                                            | 72°C : 30 sec                                     |
|                               |                                         |                                      |                                     |             |                                            |                                                   |               | 40 cycles followed with dissociation curve |                                                   |
|                               | <b>HPV18L1 cloning primer</b>           | 5' TCG CGT CCT TTA TCA CAG GGC GA 3' | L1                                  | 6141 - 6676 |                                            |                                                   | 536           | as described above                         | Used for cloning HPV18L1 region in PUC19 plasmid. |
|                               |                                         |                                      | 3' TGC CCA GGT ACA GGA GAC TGT G 5' |             |                                            |                                                   |               |                                            |                                                   |
|                               |                                         |                                      |                                     |             |                                            |                                                   |               |                                            |                                                   |
| <b>HPV18L1 qPCR</b>           |                                         | 5' TGA CAC TGT GCC TCA ATC CT 3'     | L1                                  | 6416 - 6506 | 91                                         | 95°C : 3 mins                                     |               |                                            |                                                   |
|                               |                                         | 3' AGA GCC ACT TGG AGA GGG AG 5'     |                                     |             |                                            | 95°C : 30 sec                                     |               |                                            |                                                   |
|                               |                                         | Probe-TGCCCTTGCTTCACTGGCAGC-VIC-BHQ  |                                     |             |                                            | 60°C : 30 sec                                     |               |                                            |                                                   |
|                               |                                         |                                      |                                     |             | 72°C : 30 sec                              |                                                   |               |                                            |                                                   |
|                               |                                         |                                      |                                     |             | 40 cycles followed with dissociation curve |                                                   |               |                                            |                                                   |
| <b>ddPCR</b>                  |                                         |                                      |                                     |             |                                            |                                                   |               |                                            |                                                   |
| <b>HPV16E6 DD-PCR</b>         | 5' ACT GTC AAA AGC CAC TGT GT 3'        | E6                                   | 417 - 554                           | 138         | 95°C : 10 min                              |                                                   |               |                                            |                                                   |
|                               | 3' GCT GGG TTT CTC TAC GTG TT 5'        |                                      |                                     |             | 95°C : 15 sec                              |                                                   |               |                                            |                                                   |
|                               | Probe-AGGGGTCGGGTGACCCGGTCGATGT-FAM-BHQ |                                      |                                     |             |                                            |                                                   | 55°C : 20 sec |                                            |                                                   |
|                               |                                         |                                      |                                     |             |                                            |                                                   | 40 cycles     |                                            |                                                   |
|                               |                                         |                                      |                                     |             | 95°C : 10 min                              |                                                   |               |                                            |                                                   |



|                                       |       |                                     |                                                                           |    |           |               |                                            |                                                |
|---------------------------------------|-------|-------------------------------------|---------------------------------------------------------------------------|----|-----------|---------------|--------------------------------------------|------------------------------------------------|
| RNA                                   | E6    | HPV16_E6_RTPCR using SYBR chemistry | GCACCAAAAGAGAAGACTGCAATGTT                                                | E6 | 85-108    | 152           | 95°C : 3 mins                              | Cattani et al. 2009; doi: 10.1128/JCM.01733-08 |
|                                       |       |                                     | AGTCATATACCTCACCCTCCGACAGTA                                               |    | 197-236   | 60°C : 30 sec |                                            |                                                |
|                                       |       |                                     |                                                                           |    |           |               | 40 cycles followed with dissociation curve |                                                |
|                                       |       | HPV18_E6_RTPCR using SYBR chemistry | CTATAGAGGCCAGTGCCATTCG                                                    | E6 | 503-524   | 79            | Same as above                              | Cattani et al. 2009; doi: 10.1128/JCM.01733-08 |
|                                       |       |                                     | TTATACTTGTGTTTCTCTCCGCTCG                                                 |    | 558-581   |               |                                            |                                                |
|                                       |       |                                     |                                                                           |    |           |               |                                            |                                                |
|                                       | E7    | HPV16_E7_RTPCR using SYBR chemistry | CAAAGTGTGACTCTACGGCTTCGG                                                  | E7 | 738-759   | 81            | Same as above                              | Cattani et al. 2009; doi: 10.1128/JCM.01733-08 |
|                                       |       |                                     | GTTGGCCCATTAACAGGTCCTCCAA                                                 |    | 796-818   |               |                                            |                                                |
|                                       |       |                                     |                                                                           |    |           |               |                                            |                                                |
|                                       |       | HPV18_E7_RTPCR using SYBR chemistry | TAATCAITCAACATTTACCAAGCCCG                                                | E7 | 721-744   | 113           | Same as above                              | Cattani et al. 2009; doi: 10.1128/JCM.01733-08 |
|                                       |       |                                     | CGTCTGCTGAGCTTCTACTACTA                                                   |    | 810-833   |               |                                            |                                                |
|                                       |       |                                     |                                                                           |    |           |               |                                            |                                                |
|                                       |       |                                     |                                                                           |    |           |               |                                            |                                                |
|                                       |       |                                     |                                                                           |    |           |               |                                            |                                                |
|                                       | GAPDH | GAPDH                               | CTGCACCACCACACTGCTTAG                                                     | NA | 7537-7641 | 105           | Same as above                              | Szostek et al. 2014; doi: 10.3409/fb62_1_73    |
|                                       |       |                                     | TTCTGGGTGGCAGTGATG                                                        |    |           |               |                                            |                                                |
|                                       |       |                                     |                                                                           |    |           |               |                                            |                                                |
| Sanger sequencing for mutation study- |       |                                     | As described in Krishan et al. (2015). doi: 10.12688/f1000research.7302.1 |    |           |               |                                            |                                                |

All the primers were aligned/designed using NC\_001526.4 and NC\_001357.1 sequences from NCBI for HPV16 & HPV18 respectively.

**Supplementary Table 2:** *p*-values from unpaired t-tests measuring significance in differences between differential methylation in 9 HPV associated genes between HPV +ve and HPV -ve group. Group 1: when high-copy and/or HPV E6/E7 RNA is taken into consideration to define HPV positivity, and Group 2: when HPV DNA only, irrespective of copy number, is taken into consideration to define HPV positivity.

| Genes         | Group 1<br>HPV +ve vs<br>HPV -ve | Group 2<br>HPV +ve vs<br>HPV -ve |
|---------------|----------------------------------|----------------------------------|
| <i>FERMT3</i> | < 0.00001                        | 0.0346                           |
| <i>GIT2</i>   | < 0.00001                        | 0.1052                           |
| <i>HK3</i>    | < 0.00001                        | 0.0574                           |
| <i>PRKCZ</i>  | < 0.00001                        | 0.052                            |
| <i>ZCCHC8</i> | < 0.00001                        | 0.0504                           |
| <i>IRF5</i>   | < 0.00001                        | 0.083                            |
| <i>IFFO1</i>  | < 0.00001                        | 0.0608                           |
| <i>ARID3A</i> | < 0.00001                        | 0.0654                           |
| <i>HOXA2</i>  | 0.0074                           | 0.1788                           |

Supplementary Table 3: Literature survey on HPV studies in oral cavity tumors.

| Reference                                 | Cohort    | Subsite               | Patient No.(n) | Method/Marker of HPV detection      | HPV Genotyping (INNO-LiPA) | PCR-Mass Array | DNA-PCR-Dot Blot | DNA by ISH (E2/E6/E7) | HPV-RNA by qRT-PCR (E2/E6/E7) | p16 IHC | E6/E7 IHC | E6/E7 antibody-ELISA | HPV DNA Prevalence | HPV subtype prevalence | p16 Prevalence | HPV DNA linked with outcome                                                                      | p16 linked with outcome                                                            | Comments       |
|-------------------------------------------|-----------|-----------------------|----------------|-------------------------------------|----------------------------|----------------|------------------|-----------------------|-------------------------------|---------|-----------|----------------------|--------------------|------------------------|----------------|--------------------------------------------------------------------------------------------------|------------------------------------------------------------------------------------|----------------|
| Huang et al., 2014; PMID:25907016         | Taiwan    | Oral Cavity           | 312            | HPV-DNA by PCR/qPCR/RFLP/sequencing |                            |                |                  |                       |                               |         |           |                      | 166                | HPV16                  | NA             | high HPV 16/18 E7 viral load identifies a small subgroup of patients at high-risk of 5-year DM   | NA                                                                                 |                |
| Lee et al. 2012; PMID:22808258            | Taiwan    | Oral Cavity           | 333            |                                     |                            |                |                  |                       |                               |         |           |                      | 21.3               | HPV16                  | NA             | Oral Cavity Cancer Patients is Related to an Increased Risk of Distant Metastases and Poor       | NA                                                                                 |                |
| Gracia et al., 2014; PMID:24268899        | Spain     | Oral tongue           | 64             |                                     |                            |                |                  |                       |                               |         |           |                      | 26.2               | HPV56                  | NA             | mortality showed a statistically significant correlation, being higher in HR-HPV patients        | NA                                                                                 |                |
| Lee et al., 2015; PMID:26652712           | Taiwan    | oral Cavity           | 1002           |                                     |                            |                |                  |                       |                               |         |           |                      | 19                 | HPV16                  | NA             | patients and predict 5-year OS; 5-year OS rate of HPV-positive patients was significantly lower  | NA                                                                                 |                |
| Lee et al., 2013; PMID:23669598           | Taiwan    | Oral Cavity           | 410            |                                     |                            |                |                  |                       |                               |         |           |                      | 21.2               | HPV16                  | NA             | Dfs, disease-specific survival and OS in the subgroups of OSCC patients with poor                | NA                                                                                 |                |
| Ringsstrom et al., 2002; PMID:12374687    | USA       | Oral Cavity & others* | 41             |                                     |                            |                |                  |                       |                               |         |           |                      | 5                  | HPV16                  | NA             | habit shows better clinical outcome than HPV-negative group                                      | NA                                                                                 |                |
| Smith et al. 2008; PMID:17360256          | USA       | Oral Cavity & others* | 170            |                                     |                            |                |                  |                       |                               |         |           |                      | 15                 | HPV16                  | 25             | HR-HPV is positive predictor of outcome                                                          | predictor of outcome                                                               |                |
| Smith et al. 2010; PMID:19876924          | USA       | Oral Cavity & others* | 21             |                                     |                            |                |                  |                       |                               |         |           |                      | 15.8 66e7          | NA                     | NA             | positive tumors, distinguishable by E6 and/or E7 antibody status. Differences in antibody status | NA                                                                                 |                |
| al., 2008; PMID:18268127                  | USA       | Oral Cavity & others* | 166            |                                     |                            |                |                  |                       |                               |         |           |                      | 16                 | HPV16                  | NA             | different HRs for each clinical outcome (p33 overexpression=48%); p33/HPV provides a             | NA                                                                                 |                |
| Zhao et al. 2009; PMID:20695077           | China     | Oral Cavity           | 52             |                                     |                            |                |                  |                       |                               |         |           |                      | 40.4               | HPV16                  | NA             | HPV was significantly correlated with a better survival of OSCC                                  | NA                                                                                 |                |
| Ramshankar et al., 2014; PMID:25339028    | Indian    | Oral tongue           | 167            |                                     |                            |                |                  |                       |                               |         |           |                      | 52                 | HPV16                  | 15.3           | HPV 16 DNA was not significant predictor for DFS and disease outcome.                            | was found to be a significant                                                      |                |
| Christine et al., 2014; PMID:PMID:4251957 | USA       | Oral cavity & others* | 89/80          |                                     |                            |                |                  |                       |                               |         |           |                      | 14.6 (89)          | HPV 16                 | 26.3 (80)      | between HPV 16-positive and -negative patients; Moreover, p16-positive OPSCC have                | positive tumors had significantly                                                  |                |
| al. 2014; PMID:PMID:25339028              | Venezuela | Oral Cavity & others* | 25             |                                     |                            |                |                  |                       |                               |         |           |                      | 35.4               | HPV16                  | NA             | HPV positivity in SCC is mainly associated with high-risk HPV                                    | No correlation                                                                     |                |
| Grobe et al., 2013; PMID:23721566         | Germany   | Oral cavity & others* | 222            |                                     |                            |                |                  |                       |                               |         |           |                      | 6.9                | NA                     | NA             | recurrence free survival of hpv positive patients nor to overall survival could be observed.     | NA                                                                                 |                |
| Duncan et al. 2013; PMID:23642549         | USA       | Oral Cavity           | 81             |                                     |                            |                |                  |                       |                               |         |           |                      | 8.6                | HPV16                  | 8 to 27        | positivity, 3+ staining(p16 IHC), and younger age, but not with survival                         | NA                                                                                 |                |
| Ehlango et al. 2011; PMID:21790221        | India     | Oral Cavity           | 60             |                                     |                            |                |                  |                       |                               |         |           |                      | 50                 | HPV16                  | 33             | no statistically significant difference in the survival rate among cases with respect to         | No correlation                                                                     |                |
| Stephen et al., 2013; PMID:23935769       | USA       | Oral Cavity & others* | 20             |                                     |                            |                |                  |                       |                               |         |           |                      | 50                 | HPV16                  | 20             | the prognostic effects of HPV16 and p16 were also analyzed for individual non-OP sites           | prognostic effects of HPV16 and p16 were also analyzed for individual non-OP sites |                |
| Koukietou et al., 2015; PMID:26711722     | Japanese  | Oral Cavity           | 174            |                                     |                            |                |                  |                       |                               |         |           |                      | 7.4                | HPV16                  | 13.7           | NA                                                                                               | NA                                                                                 |                |
| Walline et al., 2013; PMID:24177760       | USA       | Oral Cavity & others* | 108            |                                     |                            |                |                  |                       |                               |         |           |                      | 26                 | HPV16                  | 18.9           | NA                                                                                               | NA                                                                                 |                |
| Lingen et al., 2013; PMID:22841678        | USA       | Oral cavity           | 409            |                                     |                            |                |                  |                       |                               |         |           |                      | 5.9                | NA                     | NA             | NA                                                                                               | NA                                                                                 | No information |

| Reference                           | Cohort                                                                  | Subsite                    | Patient No.(n) | Method/Marker of HPV detection | HPV-DNA by PCR/qPCR/RT-PCR/sequencing | HPV Genotyping INNO-LiPA | PCR-Mass Array | DNA-PCR-Dot Blot | DNA by ISH | HPV-RNA by qRT-PCR (E2/E6/E7) | p16 IHC | E6/E7 IHC | E6/E7 antibody-ELISA | HPV DNA Prevalence | HPV subtype prevalence | p16 Prevalence | HPV DNA linked with outcome                                                                | p16 linked with outcome              | Comments              |   |
|-------------------------------------|-------------------------------------------------------------------------|----------------------------|----------------|--------------------------------|---------------------------------------|--------------------------|----------------|------------------|------------|-------------------------------|---------|-----------|----------------------|--------------------|------------------------|----------------|--------------------------------------------------------------------------------------------|--------------------------------------|-----------------------|---|
| 2013;Head Neck Oncol. 2013          | Indian                                                                  | OSMF & oral cavity         | 222            | ●                              | ○                                     | ○                        | ○              | ○                | ○          | ○                             | ○       | ○         | ○                    | 37.83              | HPV 16                 | NA             | NA                                                                                         | No information                       | No information        | 3 |
| Rivero et al. 2006; PMID:16729170   | Brazilian                                                               | Oral Cavity                | 40             | ●                              | ○                                     | ○                        | ○              | ○                | ○          | ○                             | ○       | ○         | ○                    | 0                  | NA                     | NA             | NA                                                                                         | No information                       | No information        | 3 |
| Giuseppe et al. 2012; PMID:22376902 | Italy                                                                   | Oral Cavity                |                | ●                              | ○                                     | ○                        | ○              | ○                | ○          | ○                             | ○       | ○         | ○                    | 11                 | NA                     | NA             | NA                                                                                         | No information                       | No information        | 3 |
| Smith et al. 2004; PMID:14696105    | USA                                                                     | Oral Cavity & Others*      | 193            | ●                              | ○                                     | ○                        | ○              | ○                | ○          | ○                             | ○       | ○         | ○                    | 13.3               | HPV 16                 | NA             | HPV is not significant in oral cavity as compare to OPSCC.                                 | No information                       | No information        | 3 |
| Herrero et al. 2003;PMID:14652239   | France                                                                  | Oral cavity & Others*      | 766            | ●                              | ○                                     | ○                        | ○              | ○                | ○          | ○                             | ○       | ○         | ○                    | 3.9                | HPV16                  | NA             | NA                                                                                         | NA                                   | NA                    | 3 |
| Kurose et al. 2004; PMID:15243477   | Japanese                                                                | Oral cavity                | 662            | ●                              | ○                                     | ○                        | ○              | ○                | ○          | ○                             | ○       | ○         | ○                    | 0.6                | HPV71 & HPV12          | NA             | NA                                                                                         | NA                                   | NA                    | 3 |
| Rice et al. 2000; PMID:10745235     | London, UK                                                              | Oral Cavity                | 267            | ●                              | ○                                     | ○                        | ○              | ○                | ○          | ○                             | ○       | ○         | ○                    | 51.7               | NA                     | NA             | NA                                                                                         | NA                                   | NA                    | 3 |
| Lobhus et al 2014; PMID:25480095    | Germany                                                                 | Oral cavity & Others*      | 60             | ●                              | ○                                     | ○                        | ○              | ○                | ○          | ○                             | ○       | ○         | ○                    | 12                 | HPV 16                 | 18.3           | oropharyngeal carcinoma but not in the oral cavity                                         | p16 showed a significant association | No information        | 2 |
| al.2013;PMID:2290780                | Canada                                                                  | Oral cavity & Others*      | 49             | ○                              | ○                                     | ○                        | ○              | ○                | ○          | ○                             | ○       | ○         | ○                    | NA                 | NA                     | 13             | NA                                                                                         | NA                                   | showed no association | 2 |
| al. 2012; PMID:2274796              | Taiwan                                                                  | Oral cavity                | 103            | ○                              | ○                                     | ○                        | ○              | ○                | ○          | ○                             | ○       | ○         | ○                    | 30.1               | HPV16                  | NA             | aggressiveness, risk exposure, or the treatment outcome                                    | NA                                   | NA                    | 2 |
| al.2012; PMID:2253230               | Belgium                                                                 | Oral cavity                | 162            | ○                              | ○                                     | ○                        | ○              | ○                | ○          | ○                             | ○       | ○         | ○                    | 44                 | HPV 16                 | 53             | wilshorfer disease-free survival in our series of 147 OSCCpatients.(org cooperation)       | analyses did not show any impact     | 0                     |   |
| al.2012; PMID:221772                | Finland                                                                 | Oral cavity & Others       | 37             | ○                              | ○                                     | ○                        | ○              | ○                | ○          | ○                             | ○       | ○         | ○                    | 41                 | HPV16                  | NA             | survival, patients with LR-HPV's treated with radiotherapy had a poor prognosis.           | NA                                   | 0                     |   |
| al.2012; PMID:215957                | Taiwan                                                                  | Oral cavity                | 65             | ○                              | ○                                     | ○                        | ○              | ○                | ○          | ○                             | ○       | ○         | ○                    | 37                 | HPV 11                 | 42             | and bears a causally associated relationship different from other carcinogenic mechanisms. | NA                                   | 3                     |   |
| al.2015; PMID:2605783               | Chile                                                                   | Oral cavity                | 80             | ○                              | ○                                     | ○                        | ○              | ○                | ○          | ○                             | ○       | ○         | ○                    | 11                 | HPV 16&18              | NA             | No association with HPV presence                                                           | NA                                   | 2                     |   |
| al.2013; PMID:237437                | Colombia                                                                | Oral cavity & others       | 175            | ○                              | ○                                     | ○                        | ○              | ○                | ○          | ○                             | ○       | ○         | ○                    | 23.9               | HPV 16&19              | NA             | NA                                                                                         | NA                                   | NA                    | 3 |
| al.2014; PMID: PMC4015165           | India                                                                   | Oral cavity                | 30             | ○                              | ○                                     | ○                        | ○              | ○                | ○          | ○                             | ○       | ○         | ○                    | NA                 | NA                     | 86.66          | NA                                                                                         | between HPV and OSCC                 | 3                     |   |
| Ghahki et al. 2012; PMID:22901210   | Pakistan                                                                | Normal oral cavity         | 192            | ○                              | ○                                     | ○                        | ○              | ○                | ○          | ○                             | ○       | ○         | ○                    | 24.5               | NA                     | NA             | association between the presence of HPV and smoking                                        | NA                                   | 3                     |   |
| al.2012; PMID:2210454               | Taiwan                                                                  | Oral and verrucous lesions | 31             | ○                              | ○                                     | ○                        | ○              | ○                | ○          | ○                             | ○       | ○         | ○                    | 28.3               | hpv L1                 | NA             | malignant transformation and disease-specific survival                                     | NA                                   | 3                     |   |
| Terao et al. 1999; PMID: 10888387   | Japan                                                                   | normal cavity              | 37             | ○                              | ○                                     | ○                        | ○              | ○                | ○          | ○                             | ○       | ○         | ○                    | 81.1               | HPV 5 subtypes         | NA             | NA                                                                                         | NA                                   | 3                     |   |
| Others*                             | represents studies that involve sites other than oral cavity            |                            |                |                                |                                       |                          |                |                  |            |                               |         |           |                      |                    |                        |                |                                                                                            |                                      |                       |   |
| ○-                                  | represents studies that show HPV as a negative indicator of outcome     |                            |                |                                |                                       |                          |                |                  |            |                               |         |           |                      |                    |                        |                |                                                                                            |                                      |                       |   |
| ●-                                  | represents studies that show HPV as a positive indicator of outcome     |                            |                |                                |                                       |                          |                |                  |            |                               |         |           |                      |                    |                        |                |                                                                                            |                                      |                       |   |
| ○-                                  | represents studies that show HPV as a not an indicator of outcome       |                            |                |                                |                                       |                          |                |                  |            |                               |         |           |                      |                    |                        |                |                                                                                            |                                      |                       |   |
| ○-                                  | represents studies that show HPV as a not an indicator of outcome       |                            |                |                                |                                       |                          |                |                  |            |                               |         |           |                      |                    |                        |                |                                                                                            |                                      |                       |   |
| ○-                                  | represents studies where no information is available on HPV and outcome |                            |                |                                |                                       |                          |                |                  |            |                               |         |           |                      |                    |                        |                |                                                                                            |                                      |                       |   |
